# Supplementary material for: Carbon nanotube papers with p–n junctions along the thickness direction
Source: Royal Society of Chemistry journal article supplement (doi:10.1039/d3ra04503j), 2023-01-01
Supplement: d3ra04503j1.pdf [file d3ra04503j1.pdf]

## Supplementary information

# Carbon nanotube papers with p-n junctions along thickness direction

Hsin-Jung Tsai, Ling-Hung Chou, Ping-Chun Chen, Yung-Kai Yang,

Wen-Kuang Hsu\*

Department of Materials Science and Engineering, National Tsing-Hua University,

Hsinchu City 300044, Taiwan

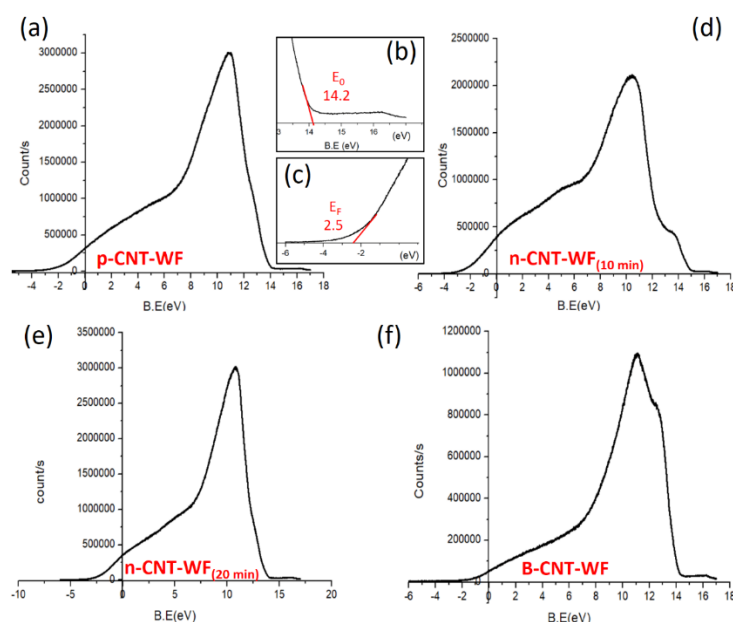

**Figure S1.** UPS spectra of samples made by p-CNT-WF with  $f_{\text{CNT}} = 20$  w.t% (a) and determination of  $E_0$  and  $E_F$  (b-c). UPS spectra of samples made by n-CNT-WF<sub>(10mins)</sub> (d), n-CNT-WF<sub>(20 mins)</sub> (e) and B-CNT-WF (f).

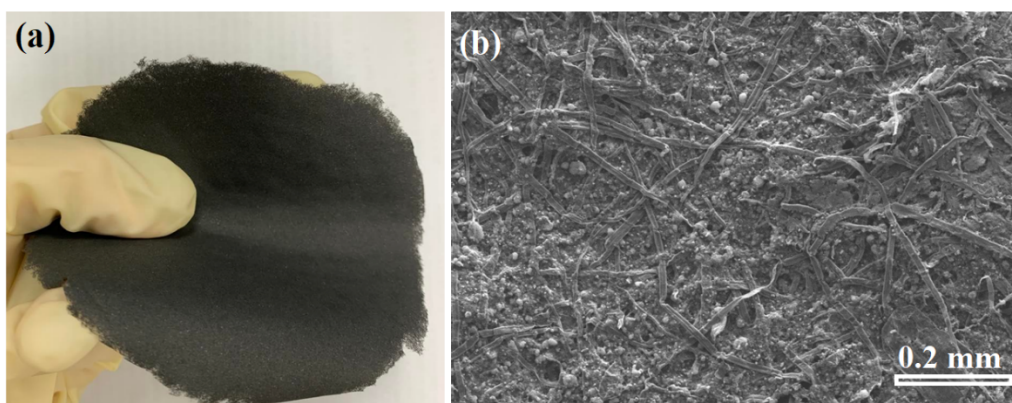

**Figure S2.** Optical (a) and low magnification ( $\times 100$ ) SEM images of p-CNT-WF with  $f_{\text{CNT}} = 20$  w.t% (b).

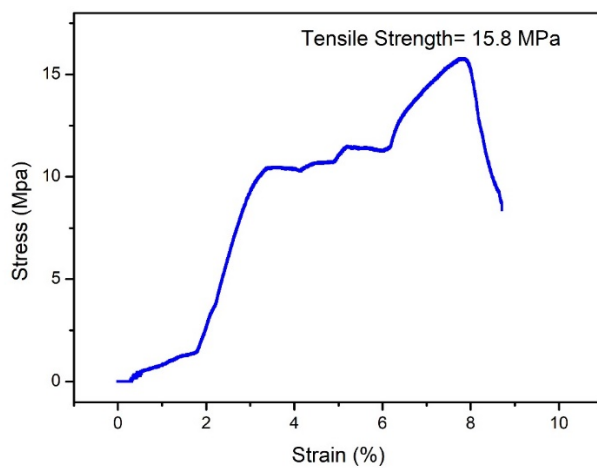

**Figure S3** stress-strain curves of the p-CNT-WF at  $f_{\text{CNT}} = 20\text{wt}\%$ .

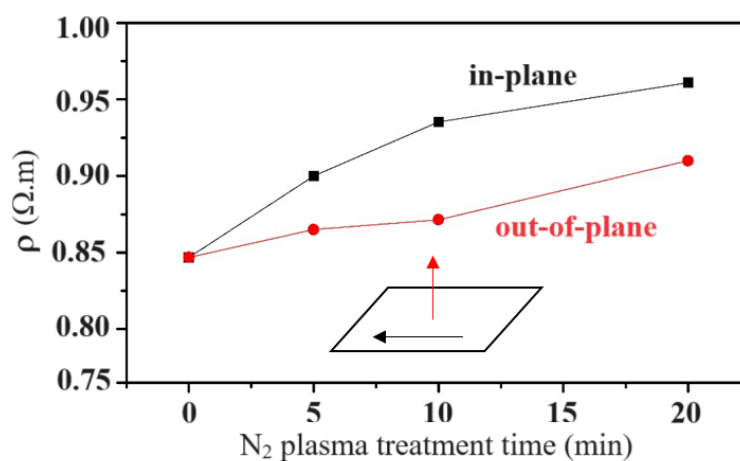

**Figure S4.** The in-plan and out-of-plan resistivity of p-CNT-WF as a function of plasma treatment time.

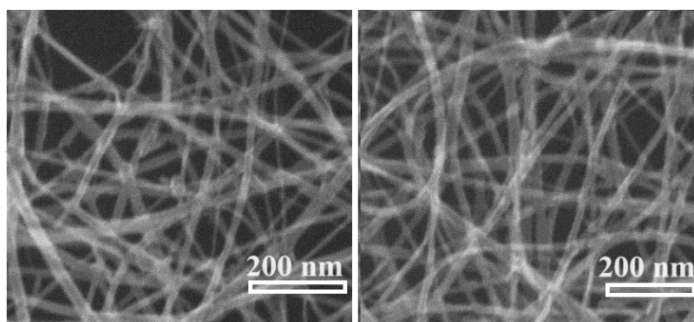

**Figure S5.** SEM images of CNTs before (left) and after  $N_2$  plasma treatment (20 min, right)

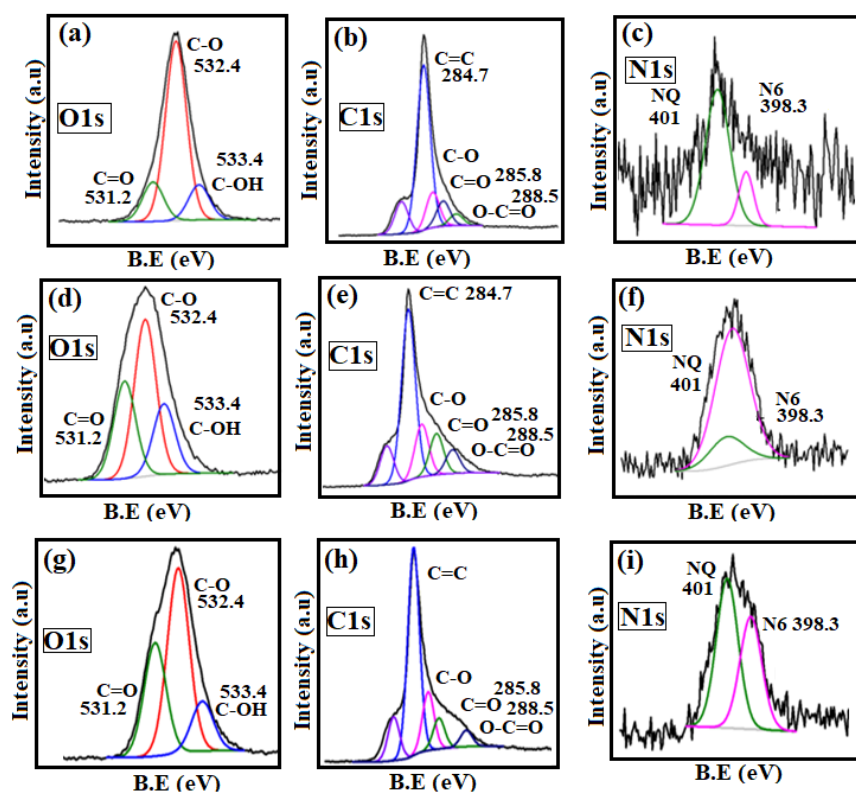

**Figure S6.** XPS spectra of O1s, C1s and N1s for p-CNT-WF (a-c), n-CNT-WF<sub>(10min)</sub> (d-f) and n-CNT-WF<sub>(20min)</sub> (g-i).

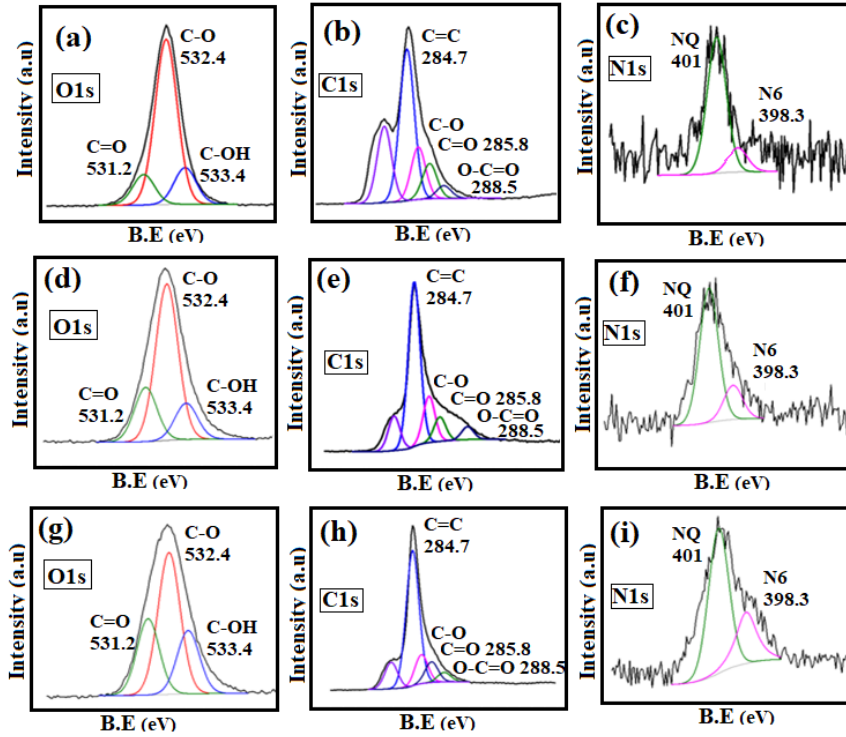

**Figure S7.** XPS spectra of O1s, C1s and N1s for B-CNT-WF (a-c), B-CNT-WF<sub>(10min)</sub> (d-f) and B-CNT-WF<sub>(20min)</sub> (g-i).

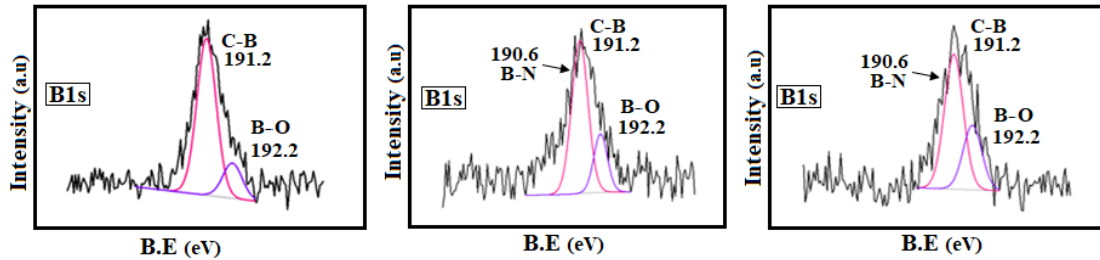

**Figure S8.** XPS spectra of B1s for p-CNT-WF (a), n-CNT-WF<sub>(10min)</sub> (b) and n-CNT-WF<sub>(20min)</sub> (c).
